## CORRECTION

# Correction: Analysis of internet of things implementation barriers in the cold supply chain: An integrated ISM-MICMAC and DEMATEL approach

The *PLOS One* Staff

## Notice of Republication

This article was republished on March 10, 2025, to correct an error in the third author's name. The correct name is: Md Abrar Jahin. The correct citation is: Ahmad K, Islam MS, Jahin MA, Mridha MF (2024) Analysis of Internet of things implementation barriers in the cold supply chain: An integrated ISM-MICMAC and DEMATEL approach. *PLoS ONE* 19(7): e0304118. <https://doi.org/10.1371/journal.pone.0304118>.

The publisher apologizes for the error. Please download this article again to view the correct version. The originally published, uncorrected article and the republished, corrected articles are provided here for reference.

## Supporting information

### S1 File. Originally published, uncorrected article.

(PDF)

### S2 File. Republished, corrected article.

(PDF)

## Reference

1. Ahmad K, Islam MS, Jahin MA, Mridha MF. Analysis of Internet of things implementation barriers in the cold supply chain: An integrated ISM-MICMAC and DEMATEL approach. *PLoS One*. 2024;19(7): e0304118. <https://doi.org/10.1371/journal.pone.0304118> PMID: [38995917](https://pubmed.ncbi.nlm.nih.gov/38995917/)

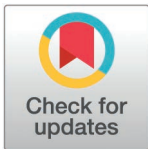

## OPEN ACCESS

**Citation:** The *PLOS One* Staff (2025) Correction: Analysis of internet of things implementation barriers in the cold supply chain: An integrated ISM-MICMAC and DEMATEL approach. *PLoS ONE* 20(4): e0321608. <https://doi.org/10.1371/journal.pone.0321608>

**Published:** April 4, 2025

**Copyright:** © 2025 The *PLOS One* Staff. This is an open access article distributed under the terms of the [Creative Commons Attribution License](https://creativecommons.org/licenses/by/4.0/), which permits unrestricted use, distribution, and reproduction in any medium, provided the original author and source are credited.
